# Supplementary material for: Association Between Tumor Mutation Burden and Prognosis in Lower-Grade Glioma: An Exploratory Study&nbsp;
Source: Research Square preprint supplement (doi:10.21203/rs.3.rs-137165/v1), 2021-01-14
Supplement: Supplementary file 1 [file 2a716e9326e94269e05eecf8.xlsx]

## Sheet: diff
gene	conMean	treatMean	logFC	pValue	fdr
AC007344.1	0.159319	0.393199	1.30334	1.17234e-10	6.96273e-09
TEAD4	1.25152	2.9789	1.25109	5.77431e-06	4.73341e-05
CDC45	0.840617	2.02108	1.26561	4.47104e-11	3.45977e-09
CXCL9	0.488165	0.995149	1.02754	4.5034e-06	3.84014e-05
CFAP45	0.235628	1.0696	2.18249	2.71787e-06	2.556e-05
IGF2BP2	0.54244	1.26682	1.22368	6.16445e-07	7.23935e-06
HOXD9	0.333893	1.79298	2.42491	6.70023e-09	1.72623e-07
ALDH3A1	0.12496	0.311476	1.31765	0.00217375	0.0064675
CLEC18B	0.36851	0.828121	1.16814	2.09462e-09	6.82912e-08
PINLYP	0.597131	1.22874	1.04106	0.000382598	0.00153376
PDLIM4	2.04744	4.94427	1.27193	8.89365e-06	6.76142e-05
HP	0.0703269	0.630735	3.16489	0.00280549	0.00798163
AC061992.1	0.129312	0.289283	1.16163	1.20185e-05	8.65047e-05
GPX8	0.386836	1.06103	1.45568	4.81551e-10	2.15358e-08
RAD51AP1	1.24178	2.61914	1.07668	2.6136e-10	1.32449e-08
AGAP2-AS1	1.06839	4.78978	2.16452	0.000528358	0.00201913
LINC00475	0.203669	0.650854	1.67611	2.39195e-12	3.94756e-10
AL390115.1	0.164158	0.385842	1.23292	0.00103217	0.00351129
OTX1	0.439281	1.01614	1.20989	0.000119251	0.000575845
KIAA0040	2.27003	4.71361	1.05412	1.35871e-05	9.57621e-05
DCDC2	0.214414	0.485505	1.17909	0.00315025	0.00876327
RSPH4A	0.629136	1.5159	1.26873	0.00125671	0.00412832
FBXO17	1.03912	2.10145	1.01602	0.0149644	0.0319304
BRIP1	0.243809	0.548029	1.1685	6.90815e-10	2.79458e-08
STAC	0.221594	1.03999	2.23057	2.89119e-06	2.68917e-05
AL035446.1	0.77447	2.75337	1.82992	1.2778e-09	4.61816e-08
FMOD	1.53757	11.4079	2.8913	2.91067e-09	8.89855e-08
HOXC10	0.116692	1.2069	3.37053	5.60638e-12	7.17795e-10
RGS22	0.163374	0.469664	1.52345	7.55103e-05	0.00039324
IL13RA2	1.48282	4.72028	1.67053	4.89798e-05	0.000277552
OSR2	0.0890235	0.408316	2.19743	1.23302e-17	4.83502e-14
LINC01202	0.477783	0.182013	-1.39231	0.0121856	0.0269157
LINC01224	0.154782	0.323103	1.06176	0.00443813	0.0116443
AC010255.2	0.17685	0.484752	1.45472	0.00440603	0.0115844
GDF15	0.771369	1.63307	1.0821	7.04851e-11	4.76259e-09
SOCS2	1.32307	3.51133	1.40812	2.86518e-06	2.67164e-05
HOXB8	0.00617825	0.42389	6.10035	1.3922e-08	3.19742e-07
VEGFA	2.68769	5.84411	1.12062	2.06466e-05	0.000135148
SOCS2-AS1	0.367292	0.881033	1.26227	0.000137938	0.000650418
OIP5	0.734203	1.50586	1.03634	3.91428e-12	5.59674e-10
NGFR	3.61309	7.63695	1.07976	2.57946e-08	5.292e-07
DLX2	0.22687	0.469319	1.0487	0.0018812	0.00574263
SH2D4A	0.288187	0.710787	1.30241	3.26156e-07	4.29554e-06
CFH	1.28134	2.61299	1.02805	5.08838e-10	2.23805e-08
FKBP9P1	0.188033	0.412075	1.13192	1.31723e-05	9.31551e-05
HOXB2	0.193768	1.19648	2.62639	1.06357e-07	1.71876e-06
H19	0.417709	5.69954	3.77028	7.63937e-05	0.000396953
PLAT	3.27771	7.09619	1.11436	5.73432e-11	4.08165e-09
FADS6	0.437819	0.215526	-1.02247	0.022906	0.0456042
AL080312.2	0.154176	0.308752	1.00187	0.0179623	0.0371415
HOTAIRM1	0.565793	2.60831	2.20477	3.0155e-06	2.77572e-05
CKAP2L	0.546516	1.32002	1.27223	3.3951e-11	2.77698e-09
IGFBP2	5.52396	22.5119	2.02691	1.95432e-08	4.1796e-07
HOXB7	0.293357	1.211	2.04547	1.34464e-10	7.78764e-09
RAB42	0.54276	1.09232	1.00901	1.35006e-09	4.83247e-08
ADAM12	0.409166	0.935151	1.19251	0.00521685	0.0132872
CLEC5A	0.369276	0.812584	1.13782	0.000806773	0.00286591
ORC1	0.46356	0.997743	1.10591	2.04166e-13	6.14113e-11
CDKN2C	5.92115	13.5619	1.19561	9.10692e-10	3.53087e-08
NEK2	0.590681	1.48715	1.3321	1.35486e-08	3.12709e-07
SIX6	0.1706	0.361641	1.08394	7.74721e-07	8.87404e-06
TGM5	0.138044	0.374244	1.43885	0.0141298	0.0304034
MAP1LC3C	0.219448	1.1996	2.4506	5.74999e-08	1.01545e-06
SERPINA5	0.472528	1.87714	1.99007	1.89079e-11	1.76307e-09
MIR10B	0.26254	0.715019	1.44545	7.73021e-09	1.96547e-07
HOXD4	0.155797	0.484691	1.6374	2.6467e-12	4.18291e-10
MMP7	0.252002	0.720129	1.51482	7.75291e-05	0.000401622
DRD5	0.324737	0.156951	-1.04896	0.000541593	0.00206336
TNFRSF11B	0.455622	1.24148	1.44615	1.10885e-12	2.15102e-10
EGFR	30.0721	85.5407	1.50819	0.00185801	0.00569433
CELSR1	0.277461	0.66634	1.26397	3.5665e-06	3.17782e-05
ZNF474	0.165543	0.404051	1.28733	4.9566e-05	0.00028011
CHI3L1	47.2637	173.074	1.87258	6.02306e-09	1.59778e-07
AL049871.1	0.142382	0.488391	1.77827	2.16537e-05	0.000140459
HOXA2	0.0560097	0.691938	3.62689	1.58994e-11	1.54735e-09
CFAP161	0.117503	0.308007	1.39026	0.0104986	0.0237868
ASF1B	1.48231	3.65536	1.30217	6.76137e-14	2.74115e-11
RASSF9	0.239271	1.13968	2.25191	0.00278649	0.00793361
TRDC	0.429161	1.15533	1.42871	0.00103777	0.00352703
HAND2	0.171285	0.485265	1.50237	6.46735e-09	1.68655e-07
E2F8	0.1805	0.400239	1.14886	1.72108e-08	3.81193e-07
COL4A1	7.22573	18.1441	1.32828	3.11078e-08	6.12597e-07
LINC01579	0.473133	1.15839	1.2918	0.000271196	0.00114398
COL3A1	4.20391	14.5682	1.79302	1.56658e-06	1.59645e-05
CNPY1	0.26574	0.704244	1.40606	7.1839e-06	5.65764e-05
GPRC5A	0.200461	0.489584	1.28824	4.20226e-09	1.20012e-07
METTL7B	9.574	22.6994	1.24546	1.60283e-11	1.54735e-09
RAD54L	0.603302	1.22819	1.02558	1.94241e-10	1.04694e-08
AC109439.2	2.66401	1.18809	-1.16496	3.29584e-16	5.37561e-13
MMP9	0.775628	2.59601	1.74286	6.03755e-05	0.000329416
OR14I1	0.271776	0.129424	-1.07031	0.0118262	0.0262749
CCER2	1.29206	2.63257	1.0268	4.42711e-07	5.51511e-06
ESM1	0.492073	1.07835	1.13188	1.10152e-05	8.05262e-05
PTX3	1.20779	2.43259	1.01013	2.79692e-06	2.61583e-05
KCNE5	2.45846	5.08472	1.04841	0.00187362	0.00572523
C6orf141	0.204764	0.473899	1.21062	0.000135538	0.000640752
CARTPT	2.04644	0.726401	-1.49428	0.0107009	0.0241688
DRC1	0.434099	1.10805	1.35193	0.0127938	0.0280235
SLC47A2	0.583816	1.41097	1.2731	0.00025847	0.0010995
HS3ST4	2.96855	1.48026	-1.0039	8.36588e-08	1.40175e-06
AC092957.1	0.140044	0.429952	1.6183	0.0113976	0.0254892
AL355916.1	10.9209	5.41305	-1.01258	1.69966e-08	3.76895e-07
LINC02217	0.574386	0.243826	-1.23617	0.000845647	0.00297444
E2F7	0.204231	0.671379	1.71692	6.7998e-12	8.34273e-10
HOXD10	0.0440979	1.02575	4.53983	4.8414e-13	1.14604e-10
ADAMDEC1	0.257959	0.688022	1.41531	1.25247e-07	1.95132e-06
GSX2	0.260818	0.685519	1.39415	0.000100387	0.000499764
LRGUK	0.165013	0.371858	1.17217	4.84587e-07	5.93764e-06
LINC01476	0.365587	0.165865	-1.1402	0.00254284	0.00734862
2020-03-09	7.06672	14.8368	1.07007	6.33992e-06	5.12053e-05
COL4A2	8.61262	20.0489	1.219	5.65228e-08	1.00104e-06
LUM	1.2196	2.50513	1.03848	2.46879e-05	0.000156494
DDIAS	0.380729	0.795436	1.06298	4.78367e-16	5.57566e-13
AP001269.2	0.146005	0.308816	1.08073	0.000974432	0.00334663
FRMPD2B	0.524001	0.224806	-1.22089	4.20022e-06	3.62012e-05
TIMP1	20.2253	50.1284	1.30947	7.3145e-11	4.87172e-09
AC025171.3	0.121099	0.313921	1.37421	9.40356e-08	1.54781e-06
AL583859.2	0.673774	0.287932	-1.22654	0.00258167	0.00744136
FSTL1	6.76	14.2595	1.07682	4.06967e-07	5.14545e-06
HOXB3	0.061417	0.862513	3.81184	6.03377e-09	1.59835e-07
PBK	2.32796	5.65543	1.28057	1.88085e-10	1.01965e-08
MCHR2	0.586017	0.264006	-1.15037	0.0119327	0.0264605
COL1A2	3.93302	9.44952	1.2646	1.28088e-06	1.35415e-05
GPR82	0.256138	0.513821	1.00435	1.19809e-08	2.84263e-07
KIF14	0.305444	0.777755	1.34841	2.05827e-11	1.85433e-09
HOXA10	0.2071	1.1481	2.47085	1.08374e-13	3.89351e-11
MCM10	0.495891	1.08405	1.12834	2.61627e-08	5.34401e-07
KIF18A	0.261351	0.564594	1.11122	8.24011e-11	5.28075e-09
XRCC2	0.463231	0.950111	1.03636	1.60966e-11	1.54735e-09
GALNT3	0.182808	0.605893	1.72874	1.22631e-09	4.51966e-08
COL6A3	0.311708	0.830696	1.41413	0.00291888	0.00824136
SFRP2	76.6451	33.9252	-1.17583	1.30677e-15	1.10772e-12
MIR4435-2HG	0.37818	0.848315	1.16553	2.34701e-09	7.46919e-08
HILS1	0.274281	0.708273	1.36865	3.68492e-06	3.26669e-05
HOXC4	0.45077	1.25405	1.47614	3.75181e-14	1.99907e-11
DEPDC1B	0.421847	0.943398	1.16115	3.67346e-09	1.08054e-07
HOXA4	0.105912	0.79849	2.91441	1.25099e-09	4.57999e-08
GGT8P	0.0614337	0.375577	2.61201	0.001417	0.00456037
GNLY	0.549075	1.14811	1.06419	9.41856e-05	0.000472168
WDR62	0.443998	0.96755	1.12378	2.24919e-11	1.97854e-09
EYA4	0.245048	0.601447	1.29537	0.0038036	0.0102239
FEZF1	0.104002	0.356889	1.77887	0.0175951	0.0365081
NUSAP1	4.09596	9.5848	1.22655	1.57581e-11	1.54735e-09
TGFB2	3.41592	8.49817	1.31488	1.03913e-06	1.13525e-05
HOXA5	0.201537	1.82758	3.18082	1.29632e-17	4.83502e-14
CHRNA9	0.15001	0.743181	2.30866	1.05546e-10	6.51766e-09
IGLV7-46	0.109579	0.484227	2.14372	0.0034675	0.00946925
DNAAF3	0.24221	0.546889	1.17499	0.00554458	0.0139731
SDC1	0.985543	2.45718	1.31801	3.62607e-13	9.5243e-11
EEF1AKMT3	1.94536	5.56639	1.51671	4.31599e-14	2.18571e-11
SRPX2	1.58684	3.3908	1.09546	4.36184e-09	1.23436e-07
SFRP4	2.68991	6.04167	1.16739	0.000860573	0.0030201
TACC3	2.04897	4.75201	1.21364	5.49881e-12	7.17114e-10
AC015909.3	0.123797	0.320593	1.37276	1.49534e-05	0.0001039
LINC01956	0.197765	0.58995	1.57681	3.74728e-16	5.37561e-13
AL355974.3	2.03835	4.47204	1.13353	2.07036e-07	2.96545e-06
NPNT	2.00369	5.889	1.55537	1.86736e-11	1.75881e-09
METTL1	3.78677	8.9534	1.24147	2.1428e-12	3.6001e-10
DTL	0.962643	2.11903	1.13833	2.23572e-10	1.1679e-08
AC026401.3	2.39705	4.85854	1.01926	2.26279e-10	1.17873e-08
CLCF1	0.678771	1.63371	1.26715	2.44679e-09	7.72799e-08
AC126564.1	0.531567	0.245293	-1.11575	1.11594e-07	1.78025e-06
GPC3	0.910497	1.96713	1.11137	0.00150136	0.00477878
ZMYND10	1.16972	2.6935	1.20332	0.0123996	0.0273173
GTSE1	0.825379	1.98916	1.26903	3.54008e-11	2.87039e-09
GJC1	0.857842	1.74292	1.02272	4.15839e-13	1.034e-10
HOXA7	0.0822461	0.679101	3.04561	4.3365e-14	2.18571e-11
CDCA8	1.21298	2.91416	1.26452	1.45622e-12	2.68882e-10
PITX1	0.187325	0.432938	1.20861	1.84935e-08	4.0103e-07
IGHG3	1.20943	2.47938	1.03565	0.00349516	0.009535
CEP55	0.53971	1.19319	1.14457	2.07575e-11	1.86109e-09
CYTOR	0.433261	0.920411	1.08704	1.38653e-07	2.12818e-06
PDPN	5.89717	16.5213	1.48623	0.000519925	0.00199139
CIDEA	0.310798	0.13147	-1.24124	1.14237e-05	8.296e-05
HJURP	0.721147	1.92264	1.41472	5.50187e-11	4.0237e-09
IGLV1-47	0.725497	1.57316	1.11663	0.0167036	0.0349608
C1orf189	0.186578	2.12662	3.51071	8.88108e-05	0.000449453
IRX5	0.247519	0.526104	1.08781	6.55711e-13	1.40556e-10
MYOD1	0.646956	0.310929	-1.05708	2.88646e-10	1.43618e-08
ANKRD53	0.330468	0.664798	1.00841	4.93727e-08	8.93934e-07
AC125616.1	0.942088	0.458899	-1.03769	7.78928e-08	1.31817e-06
C6orf118	0.444174	1.03071	1.21443	0.000645831	0.00237697
AC108463.1	0.254683	0.608378	1.25626	5.46756e-07	6.5826e-06
MAL2	3.90637	1.87461	-1.05924	0.00124054	0.00408454
AC016168.2	0.194943	0.393743	1.0142	8.84394e-05	0.000447816
CD101	0.390702	0.917195	1.23116	1.83906e-08	3.99262e-07
CXCL11	0.368709	0.843463	1.19384	3.01513e-06	2.77572e-05
HOXA6	0.0460015	0.474004	3.36515	6.29296e-18	3.91191e-14
GAS2L3	0.333958	0.829724	1.31297	3.65158e-10	1.74411e-08
IGHG4	0.352653	1.73183	2.29598	0.000194542	0.000870863
LINC02308	0.425801	1.0617	1.31812	5.51673e-08	9.81733e-07
NEIL3	0.239315	0.595593	1.31541	1.53698e-10	8.58178e-09
NEUROD6	2.20298	0.802537	-1.45682	0.000220651	0.00096549
TBX5	0.328185	0.956691	1.54354	2.19007e-05	0.000141618
HOXA11	0.184298	0.639132	1.79407	2.84141e-08	5.68556e-07
HOXA11-AS	0.117891	0.354167	1.58698	2.25699e-09	7.2073e-08
GPR156	0.200986	0.409488	1.02673	4.17777e-10	1.93135e-08
FAM180A	0.275732	0.702664	1.34957	0.000274139	0.00115352
POLQ	0.140805	0.312022	1.14795	1.68681e-10	9.22504e-09
HOXA3	0.0588903	0.51896	3.13952	3.47686e-16	5.37561e-13
GRP	3.77561	0.447394	-3.07709	0.0147982	0.0316518
ASPM	0.337853	1.02802	1.6054	1.10585e-11	1.16514e-09
NUF2	0.941105	2.22892	1.24392	3.37285e-12	5.0726e-10
SAA1	0.159308	4.71925	4.88867	6.25347e-09	1.64024e-07
KIF2C	1.3347	3.21442	1.26804	1.24655e-11	1.28436e-09
EN1	0.197325	1.14689	2.53908	3.05298e-12	4.70538e-10
AC091932.1	0.245311	0.62967	1.35998	1.67706e-07	2.48021e-06
AL645924.1	0.551239	1.33533	1.27644	0.000547977	0.00208216
JHY	0.277991	0.604841	1.12152	0.00775886	0.0185506
DMRTA2	0.459117	1.72145	1.90669	0.00193716	0.00588406
IQGAP2	1.06568	2.81358	1.40063	1.21816e-15	1.08179e-12
IGF2BP3	0.122781	0.407516	1.73077	6.13994e-05	0.000333441
NDC80	0.798963	2.12392	1.41053	2.75433e-13	7.78267e-11
KNL1	0.370377	0.861249	1.21744	2.21785e-10	1.16182e-08
ADAM33	0.493891	1.3566	1.45773	0.000281798	0.00118016
HAGLROS	0.134483	0.35304	1.39241	0.0192088	0.0393481
COL8A1	0.508194	1.23574	1.28192	1.12238e-08	2.69386e-07
CENPF	1.40791	3.78652	1.42732	6.76404e-11	4.65471e-09
PRLHR	6.0511	2.50976	-1.26965	6.45284e-15	4.14962e-12
SHOX2	0.14703	1.19617	3.02425	3.89569e-10	1.83461e-08
EMP3	5.48542	15.4812	1.49684	1.59804e-09	5.52911e-08
AC141557.2	0.35473	0.743825	1.06824	0.00278337	0.00792595
AC131097.4	0.165138	0.488993	1.56614	0.00152549	0.0048432
CENPA	0.457599	1.28936	1.4945	4.0183e-12	5.63438e-10
MS4A4E	0.176016	0.36251	1.04231	2.22315e-09	7.1359e-08
TEX26	0.65338	1.40105	1.10052	5.36102e-05	0.000299963
TROAP	0.635819	1.77355	1.47995	9.01778e-11	5.66238e-09
AQP1	84.8605	227.04	1.41978	7.90789e-09	2.00645e-07
FSTL5	3.61866	1.71357	-1.07845	1.67263e-16	3.6495e-13
KLK7	0.932213	0.428697	-1.1207	0.0103124	0.0234332
STEAP3	2.73828	6.50646	1.2486	7.40316e-07	8.52231e-06
PSORS1C1	0.185341	0.371312	1.00245	2.02954e-07	2.91593e-06
DLX5	0.665765	1.8114	1.44402	0.0162624	0.0342144
PLA2G2A	0.524076	1.97555	1.91441	3.70789e-07	4.78205e-06
SV2B	5.21463	2.58839	-1.01051	0.0181967	0.0375388
NKX2-5	0.0993156	0.55293	2.477	5.90527e-10	2.5029e-08
EMILIN2	0.776341	1.74521	1.16864	0.000221408	0.000968122
TBX5-AS1	0.0941643	0.382588	2.02254	0.000412275	0.00163725
SKA1	0.417708	0.992384	1.2484	1.47012e-10	8.38419e-09
DPEP1	0.419255	1.29079	1.62235	4.31316e-09	1.22243e-07
CFAP73	0.407635	1.35377	1.73163	0.0141791	0.0304919
TTK	0.488879	1.16981	1.25873	1.96355e-09	6.45824e-08
LINC01358	0.142056	0.315	1.1489	4.85735e-05	0.000275585
UBE2C	4.01594	10.414	1.37472	6.4641e-11	4.48138e-09
RXFP1	0.802068	0.39588	-1.01866	0.00160348	0.00503931
FOXD3-AS1	0.973657	1.99837	1.03734	1.24253e-05	8.88154e-05
PCLAF	0.751252	1.76792	1.23468	1.67945e-09	5.69455e-08
LBP	0.12974	0.280646	1.11312	0.010608	0.0240025
LRRC46	0.519139	1.05077	1.01726	3.86766e-08	7.26364e-07
HOXB4	0.0335789	0.526761	3.97152	9.14454e-07	1.01269e-05
KIFC1	2.26316	4.85661	1.10161	4.24434e-10	1.94957e-08
MIR155HG	0.171779	0.374625	1.1249	2.03577e-09	6.66055e-08
CDCA2	0.2908	0.755225	1.37688	6.43144e-13	1.39465e-10
TPX2	3.86108	8.95149	1.21312	2.36161e-12	3.93229e-10
TENT5B	0.486329	0.983273	1.01566	1.26899e-06	1.3431e-05
PIMREG	1.87616	4.56441	1.28264	6.38865e-10	2.65942e-08
DLGAP5	0.516532	1.32473	1.35877	1.15681e-10	6.89284e-09
OTP	0.0533311	0.380066	2.8332	4.52636e-19	4.2206e-15
E2F2	0.503456	1.15362	1.19623	4.34614e-10	1.97686e-08
PI15	0.170866	0.366231	1.09989	3.44496e-08	6.62321e-07
TFF3	0.167161	0.355775	1.08973	1.59078e-06	1.61935e-05
SEC61G	15.1361	69.0507	2.18966	7.82621e-10	3.132e-08
SLN	3.46504	11.0646	1.675	4.16521e-05	0.000241909
NSUN7	0.163251	0.444393	1.44475	2.25503e-05	0.000145114
S100A3	1.44316	3.06048	1.08453	5.93472e-09	1.58336e-07
TMEM71	0.307922	0.720621	1.22668	3.16606e-08	6.19558e-07
AOX1	0.172862	0.360845	1.06176	2.31787e-05	0.000148237
MPPED1	3.37613	1.63161	-1.04907	0.00318827	0.00884529
TXLNB	0.464651	1.02454	1.14076	5.74435e-05	0.000316848
LINC01831	0.161667	0.529362	1.71123	2.43891e-08	5.03691e-07
TSTD1	2.10278	4.45751	1.08394	0.00774463	0.0185237
CDK1	1.77472	3.6667	1.04689	4.72156e-10	2.12687e-08
WISP1	0.301493	0.933405	1.63038	0.000112524	0.00054833
CXCL10	1.95743	4.49112	1.19812	2.79912e-05	0.000174003
LIF	0.562611	1.53397	1.44706	4.23826e-06	3.64909e-05
OTOS	0.872412	3.33599	1.93503	3.90389e-06	3.42325e-05
HOXD13	0.0608866	0.878733	3.85123	9.43249e-16	9.25824e-13
AL354863.1	1.03766	0.488525	-1.08682	5.41443e-05	0.000302407
SKA3	0.779298	1.64894	1.08129	2.41917e-09	7.67264e-08
MELK	0.8413	2.15007	1.35369	1.9898e-11	1.82797e-09
SPATA17	0.260463	0.56287	1.11172	0.000624227	0.00231943
OSR1	0.281661	0.679357	1.27021	1.48185e-06	1.52008e-05
CA3	0.692795	4.2443	2.61503	1.08385e-10	6.62711e-09
AL512785.1	0.286969	0.802699	1.48396	0.000192176	0.000861974
CENPU	1.36697	3.22372	1.23774	4.87275e-10	2.16362e-08
FAM111B	0.569878	1.32233	1.21436	2.74146e-11	2.31338e-09
TNFAIP6	0.766319	2.32577	1.60169	2.64404e-07	3.63365e-06
HS3ST3B1	0.308668	0.944036	1.61278	2.07985e-10	1.11266e-08
CENPK	0.407185	1.00169	1.29867	5.73432e-11	4.08165e-09
ESPL1	0.374157	0.889568	1.24946	3.28036e-10	1.59311e-08
AC064875.1	0.27494	0.933314	1.76324	1.43735e-05	0.000100507
AC025176.1	0.130874	0.390009	1.57533	6.35615e-10	2.65181e-08
BIRC5	2.24619	5.27736	1.23234	4.52716e-11	3.46012e-09
AL356479.1	1.00991	0.482224	-1.06646	0.00565461	0.0142139
ARHGAP11A	0.891156	1.84892	1.05293	7.40533e-11	4.87993e-09
CENPE	0.306921	0.757265	1.30293	2.20056e-09	7.10006e-08
AC025171.5	0.196717	0.649495	1.7232	1.41479e-08	3.24134e-07
FOXM1	2.57142	6.27032	1.28597	6.02341e-12	7.58991e-10
SEL1L3	1.92906	4.09004	1.08422	0.00066813	0.00244985
G0S2	1.26835	2.82465	1.15512	1.60559e-05	0.000109761
PDZK1IP1	0.210111	0.458072	1.12442	5.03905e-09	1.39841e-07
SHCBP1	0.67547	1.47889	1.13055	9.39262e-13	1.88347e-10
CHI3L2	7.8055	18.5269	1.24706	7.05722e-09	1.80535e-07
TGFB2-AS1	1.82323	4.09718	1.16813	7.83927e-08	1.32423e-06
TYMS	4.44302	9.27642	1.06203	1.33543e-08	3.10143e-07
AC097713.1	0.124451	0.481367	1.95155	5.79636e-06	4.74523e-05
CACNG3	5.16413	2.5254	-1.03201	0.00116246	0.00387606
FCGR2B	0.146765	0.293771	1.00119	8.01289e-05	0.000412455
SLC34A2	0.141475	0.411894	1.54172	4.68242e-06	3.98006e-05
AC104024.2	0.737287	0.352555	-1.06438	0.00358159	0.00972243
COL5A2	2.55383	5.53736	1.11654	0.00115497	0.00385382
CYP27B1	0.186947	1.61491	3.11075	6.57303e-14	2.72401e-11
DSG2	0.158469	0.412719	1.38096	0.00133391	0.00434743
CDC20	2.10282	5.62243	1.41886	1.37623e-09	4.89795e-08
CRNDE	0.911096	2.55813	1.48941	7.49931e-13	1.53686e-10
FLNC	4.25954	10.6237	1.31852	2.71651e-05	0.000169659
DEPDC1	0.166849	0.545826	1.7099	1.02375e-11	1.12305e-09
AL596330.1	0.165692	0.66109	1.99634	2.12441e-07	3.03587e-06
HOXB-AS1	0.0922932	0.488139	2.403	4.96327e-07	6.04967e-06
C7orf57	0.504844	1.87815	1.89541	3.03673e-05	0.000186351
AJ011932.1	0.358741	0.745228	1.05474	3.17614e-05	0.000193442
MOXD1	1.66601	6.29516	1.91785	0.00334458	0.00919192
POSTN	3.3595	7.13936	1.08755	0.00904013	0.0210649
WDR63	0.178921	0.508776	1.50771	0.0198667	0.0404779
AURKB	1.2417	3.08489	1.3129	3.11502e-10	1.52073e-08
AC123912.4	0.326118	0.670899	1.0407	0.0207419	0.0419586
TRH	1.7669	5.43667	1.62151	2.97965e-05	0.000183512
HOXD11	0.0133177	0.437277	5.03713	6.21187e-16	6.43584e-13
FAM183A	0.315539	2.88281	3.19159	0.00588829	0.014716
OCIAD2	2.3794	5.00359	1.07237	5.94347e-05	0.000325329
WNT16	0.124468	0.548853	2.14065	0.0218081	0.0437264
MND1	0.570402	1.15801	1.02159	7.16554e-11	4.78961e-09
CLSPN	0.351912	0.783888	1.15543	4.38613e-08	8.1471e-07
FAM83D	0.747318	1.63666	1.13096	3.1831e-06	2.89993e-05
KIF20A	0.711864	1.79664	1.33563	6.62606e-11	4.57664e-09
MAP3K7CL	0.650006	1.46341	1.17081	2.65276e-07	3.64295e-06
SLCO4A1-AS1	0.335779	0.702828	1.06566	0.00014338	0.000672507
CD248	2.04852	4.12619	1.01023	2.25667e-07	3.17142e-06
CHRNA1	0.33804	1.44732	2.09812	0.00613993	0.0152206
SERPINA3	0.425609	0.948192	1.15565	2.13123e-05	0.000138727
FOXJ1	4.3574	11.0579	1.34353	8.08798e-06	6.24308e-05
IQGAP3	0.631257	1.46638	1.21596	1.32437e-09	4.74965e-08
SGO1	0.295392	0.719524	1.28441	9.03867e-12	1.02159e-09
AC008780.2	1.11213	0.536911	-1.05057	0.0185784	0.038229
NCAPG	0.678891	1.75529	1.37046	1.4433e-12	2.68882e-10
TCTEX1D1	0.705618	2.45919	1.80122	0.0196712	0.0401541
HTR2C	1.45504	0.297338	-2.29088	1.02958e-07	1.67399e-06
RD3	0.37767	0.0373902	-3.33639	3.28248e-05	0.000199137
BUB1	0.750114	1.72666	1.2028	8.2932e-12	9.54691e-10
PTTG1	2.78746	6.25913	1.16701	4.58397e-11	3.48925e-09
CCNB2	1.26875	3.24566	1.35511	4.95397e-12	6.5061e-10
RRM2	1.57735	3.75192	1.25013	8.8629e-10	3.45783e-08
FCGR2C	0.224195	0.538108	1.26314	0.00026349	0.00111729
COL1A1	3.37909	10.3389	1.61338	3.46659e-05	0.000208409
SPINK8	1.26943	2.63522	1.05375	5.64021e-11	4.07691e-09
KIF23	0.456573	1.14011	1.32025	3.62995e-11	2.91789e-09
SMC4	1.28754	2.58352	1.00472	2.14777e-10	1.13146e-08
VAV3	0.522543	1.25773	1.2672	1.0589e-05	7.80532e-05
RASEF	0.0915345	0.341538	1.89966	0.00447704	0.0117314
SLC6A7	2.00965	0.970108	-1.05073	0.024817	0.048702
HOXA9	0.0199872	0.619615	4.95422	1.13166e-10	6.82991e-09
CDC25C	0.347764	0.779973	1.16531	6.54036e-10	2.70307e-08
HASPIN	0.218113	0.484538	1.15153	3.31092e-11	2.7321e-09
CCNB1	3.24405	6.52871	1.009	1.51852e-10	8.55555e-09
ESCO2	0.231028	0.533222	1.20667	5.50453e-10	2.35986e-08
OTOG	0.499881	0.197554	-1.33934	0.00365914	0.00988833
LTF	3.23969	25.5069	2.97696	4.72249e-07	5.80935e-06
ANXA1	10.3014	26.801	1.37945	5.68013e-10	2.41846e-08
NCAPH	1.18009	2.44918	1.0534	4.14486e-10	1.92762e-08
FABP4	0.550172	1.80392	1.71318	0.0108881	0.0245262
COL5A1	0.759544	1.64203	1.11227	8.05429e-05	0.000414129
HOXD-AS2	0.339395	0.727669	1.10032	7.08083e-12	8.54268e-10
HOXC9	0.0479043	0.373255	2.96194	6.57334e-12	8.11829e-10
AC125807.2	0.366728	0.765329	1.06137	0.00177427	0.00548275
ERCC6L	0.147901	0.325075	1.13615	8.37645e-11	5.34974e-09
FABP5	2.24021	5.7009	1.34756	0.000533234	0.00203568
NNMT	2.02209	4.75642	1.23403	5.83101e-08	1.02878e-06
C11orf88	0.0583454	0.414972	2.83032	0.000378383	0.00151915
MYBL2	2.03571	5.88406	1.53128	9.03654e-10	3.51088e-08
EXO1	0.417155	1.14211	1.45305	6.41098e-11	4.46113e-09
RARRES2	3.73943	8.01567	1.1	0.00283763	0.00805462
AC004233.2	0.110886	5.51978	5.63746	3.1355e-07	4.16482e-06
ARL9	0.327798	0.671083	1.03369	1.16304e-05	8.40043e-05
ABCC3	0.601572	1.95209	1.69821	7.6753e-10	3.08484e-08
FABP5P7	0.111125	0.304281	1.45322	0.00146028	0.00467296
TOP2A	4.14541	10.3566	1.32096	4.59303e-10	2.07398e-08
SPC24	1.21307	2.87439	1.24459	1.32839e-10	7.7175e-09
KIF4A	1.09643	2.67307	1.28568	2.07745e-12	3.58493e-10
TWIST1	0.610462	1.35469	1.14999	6.58056e-09	1.70209e-07
LINC01007	0.719732	0.214525	-1.74632	8.66925e-05	0.000440166
IGLV2-23	0.676479	1.42578	1.07564	0.0245995	0.0483563
CDC6	0.611253	1.23512	1.0148	6.0677e-09	1.60279e-07
CCNA2	1.4895	3.10784	1.06108	3.12237e-11	2.61117e-09
OCA2	0.332916	0.105567	-1.657	0.0119537	0.0264976
